# Supplementary material for: Evaluation of COVID-19 Effect on Mental Health, Self-Harm, and Suicidal Behaviors in Children and Adolescents Population
Source: MDPI journal article supplement (doi:10.3390/jcm13030744), 2024-01-27
Supplement: s1 [file s1]

# OCENA JAKOŚCI FUNKCJONOWANIA PSYCHOFIZYCZNEGO DZIECI I MŁODZIEŻY W DOBIE PANDEMII COVID-19 W ZALEŻNOŚCI OD MIEJSCA ZAMIESZKANIA

Witajcie!

Ankieta, o której wypełnienie prosimy, skierowana jest do dzieci i młodzieży w wieku szkolnym (6-18 lat) i jest całkowicie anonimowa. Jej wyniki będą wykorzystane do opracowania naukowego. Tematy poruszane w ankiecie są dla nas psychiatrów bardzo ważne, sam pomysł stworzenia tego badania powstał w wyniku wielu rozmów z Waszymi koleżankami i kolegami, którzy prosili, aby zwrócić uwagę na ich problemy wynikające z izolacji w okresie pandemii COVID-19. Mamy świadomość, że jest to temat sprawiający wiele problemów, które my - dorośli nie zawsze wiemy jak rozwiązać. Wyniki ankiety oprócz wniosków związanych z pandemią mogą bardzo przydać się w przyszłości, pomóc zrozumieć Was lepiej. Dlatego bardzo prosimy o wypełnienie poniższej ankiety. Zajmie to około 10 minut, a wyniki jakie uzyskamy mogą pozwolić dorosłym lepiej wspierać młodsze pokolenia w sytuacjach kryzysowych. Jeśli zechcecie pomóc w tym projekcie prosimy również o zachęcenie znajomych do wypełnienia ankiety. Im więcej informacji uzyskamy, tym lepiej.

Serdecznie dziękujemy i pozdrawiamy! :)

lek. Jagoda Grzejszczak, Klinika Psychiatrii Młodzieżowej CSK UM Łódź  
prof. dr hab. n. med. Dominik Strzelecki, Klinika Zaburzeń Afektywnych i Psychotycznych CSK UM Łódź

Jeżeli jako Rodzic zgadzasz się na wzięcie udziału Twojego Dziecka w Naszych badaniach ankietowych udostępniij pytania Dziecku. Jeśli jesteś Uczniem, który otrzymał poniższy arkusz z pytaniami od Rodzica i zgadzasz się na udział w Naszych badaniach ankietowych przejdź prosimy do wypełniania poniższego kwestionariusza.

---

\* Wskazuje wymagane pytanie

## 1. Płeć \*

*Zaznacz wszystkie właściwe odpowiedzi.*

- ☐ mężczyzna (chłopak)  
☐ kobieta (dziewczyna)

## 2. Data urodzenia (rok, np. 2005) \*

---

## 3. W jakim miejscu mieszkałeś podczas pandemii? \*

*Zaznacz tylko jedną odpowiedź.*

- ☐ Warszawa (stolica)
- ☐ miasto (od 100 tys. do 1 mln mieszkańców)
- ☐ miasto (od 20 tys. do 100 tys. mieszkańców)
- ☐ miasteczko (od 10 tys. do 20 tys. mieszkańców)
- ☐ miasteczko (poniżej 10 tys. mieszkańców)
- ☐ wieś

## 4. Gdzie mieszkałeś podczas pandemii? \*

*Zaznacz tylko jedną odpowiedź.*

- ☐ blok mieszkalny
- ☐ dom szeregowy
- ☐ dom wolnostojący
- ☐ placówka wychowawcza/oświatowa (np.internat)

## 5. Czy masz swój pokój? \*

*Zaznacz tylko jedną odpowiedź.*

- ☐ tak
- ☐ tak, ale dzielę go z kimś (np.rodzeństwo)
- ☐ nie

6. Czy w okresie pandemii miałeś swobodny dostęp do komputera, żeby móc swobodnie się komunikować czy uczestniczyć w zajęciach szkolnych? \*

*Zaznacz tylko jedną odpowiedź.*

☐ tak

☐ nie

7. Ile osób zamieszkiwało z Tobą w domu w okresie pandemii (włączając Ciebie)? \*

*Zaznacz tylko jedną odpowiedź.*

☐ 2

☐ 3

☐ 4

☐ 5

☐ 6 i więcej

8. Ile masz rodzeństwa? \*

*Zaznacz tylko jedną odpowiedź.*

☐ 0

☐ 1

☐ 2

☐ 3

☐ 4 i więcej

## 9. Wykształcenie - na jakim etapie kształcenia jesteś? \*

*Zaznacz tylko jedną odpowiedź.*

- ☐ szkoła podstawowa
- ☐ liceum ogólnokształcące
- ☐ liceum profilowane
- ☐ technikum
- ☐ zasadnicza szkoła zawodowa

## 10. Jakie zajęcia szkolne odbywały się w Twojej placówce w okresie pandemii (wybierz odpowiedź pasującą do &gt;50% zajęć)? \*

*Zaznacz tylko jedną odpowiedź.*

- ☐ stacjonarne
- ☐ zdalne
- ☐ hybrydowe

## 11. Jak oceniasz przygotowanie nauczycieli oraz możliwości techniczne szkoły do prowadzenia zajęć dydaktycznych w dobie pandemii COVID? \*

*Zaznacz tylko jedną odpowiedź.*

|     |                       |                       |                       |                       |                       |        |
|-----|-----------------------|-----------------------|-----------------------|-----------------------|-----------------------|--------|
|     | 1                     | 2                     | 3                     | 4                     | 5                     |        |
| źle | <input type="radio"/> | dobrze |

## 12. Jak oceniasz chęć pomocy oraz empatyczne podejście nauczycieli w dobie pandemii COVID? \*

*Zaznacz tylko jedną odpowiedź.*

|     |                       |                       |                       |                       |                       |        |
|-----|-----------------------|-----------------------|-----------------------|-----------------------|-----------------------|--------|
|     | 1                     | 2                     | 3                     | 4                     | 5                     |        |
| źle | <input type="radio"/> | dobrze |

13. Czy Twoim zdaniem nauczyciele w dobie pandemii COVID byli bardziej wrozumieli w stosunku do uczniów niż przed pandemią? (3-bez zmian) \*

*Zaznacz tylko jedną odpowiedź.*

|       |                       |                       |                       |                       |                       |          |
|-------|-----------------------|-----------------------|-----------------------|-----------------------|-----------------------|----------|
|       | 1                     | 2                     | 3                     | 4                     | 5                     |          |
| <hr/> |                       |                       |                       |                       |                       |          |
| mnie  | <input type="radio"/> | bardziej |
| <hr/> |                       |                       |                       |                       |                       |          |

14. Czy ktoś z Twoich bliskich (rodzice, dziadkowie, rodzeństwo, rodzeństwo rodziców) jest zatrudniony w systemie ochrony zdrowia? \*

*Zaznacz tylko jedną odpowiedź.*

- ☐ nie
- ☐ jako lekarz/-arka
- ☐ jako pielęgniarz/-arka
- ☐ inny pracownik medyczny mający w pracy kontakt z pacjentem

#### Ogólne samopoczucie w okresie pandemii

15. Jak określisz swój ogólny stan zdrowia PRZED pandemią w skali do 10? \*

*Zaznacz tylko jedną odpowiedź.*

|       |                       |                       |                       |                       |                       |                       |                       |                       |                       |                       |           |
|-------|-----------------------|-----------------------|-----------------------|-----------------------|-----------------------|-----------------------|-----------------------|-----------------------|-----------------------|-----------------------|-----------|
|       | 1                     | 2                     | 3                     | 4                     | 5                     | 6                     | 7                     | 8                     | 9                     | 10                    |           |
| <hr/> |                       |                       |                       |                       |                       |                       |                       |                       |                       |                       |           |
| zły   | <input type="radio"/> | doskonały |
| <hr/> |                       |                       |                       |                       |                       |                       |                       |                       |                       |                       |           |

16. Jak określisz swój ogólny stan zdrowia W OKRESIE pandemii w skali do 10? \*

*Zaznacz tylko jedną odpowiedź.*

|       |                       |                       |                       |                       |                       |                       |                       |                       |                       |                       |           |
|-------|-----------------------|-----------------------|-----------------------|-----------------------|-----------------------|-----------------------|-----------------------|-----------------------|-----------------------|-----------------------|-----------|
|       | 1                     | 2                     | 3                     | 4                     | 5                     | 6                     | 7                     | 8                     | 9                     | 10                    |           |
| <hr/> |                       |                       |                       |                       |                       |                       |                       |                       |                       |                       |           |
| zły   | <input type="radio"/> | doskonały |
| <hr/> |                       |                       |                       |                       |                       |                       |                       |                       |                       |                       |           |

17. Czy chorujesz przewlekłe (cukrzyca, astma/alergia, choroby układu pokarmowego)? \*

*Zaznacz tylko jedną odpowiedź.*

☐ tak

☐ nie

18. Jeśli tak - wpisz jakie to schorzenie, jeśli nie - wpisz "NIE" \*

---

Stan psychiczny w okresie pandemii

19. Jak określisz swój psychiczny stan zdrowia PRZED pandemią w skali do 10? \*

*Zaznacz tylko jedną odpowiedź.*

1 2 3 4 5 6 7 8 9 10

---

zły ☐ ☐ ☐ ☐ ☐ ☐ ☐ ☐ ☐ ☐ doskonały

---

20. Jak określisz swój psychiczny stan zdrowia W OKRESIE pandemii w skali do 10? \*

*Zaznacz tylko jedną odpowiedź.*

1 2 3 4 5 6 7 8 9 10

---

zły ☐ ☐ ☐ ☐ ☐ ☐ ☐ ☐ ☐ ☐ doskonały

---

21. Czy PRZED okresem pandemii miałeś kłopoty ze zdrowiem psychicznym? \*  
(możliwych kilka odpowiedzi)

*Zaznacz wszystkie właściwe odpowiedzi.*

- ☐ nie
- ☐ depresja
- ☐ zaburzenia lękowe
- ☐ zachowania impulsywne (np.samookaleczenia)
- ☐ myśli i tendencje samobójcze
- ☐ psychoza (np.schizofrenia)
- ☐ zaburzenia tikowe
- ☐ uzależnienie od alkoholu/innych SPA (substancji psychoaktywnych)

22. Czy PRZED okresem pandemii miałeś kłopoty ze zdrowiem psychicznym, co wiązało się z korzystaniem z porad specjalistów (psycholog, psychoterapeuta, psychiatra)? (możliwych kilka odpowiedzi) \*

*Zaznacz wszystkie właściwe odpowiedzi.*

- ☐ nie
- ☐ depresja
- ☐ zaburzenia lękowe
- ☐ zachowania impulsywne (np.samookaleczenia)
- ☐ myśli i tendencje samobójcze
- ☐ psychoza (np.schizofrenia)
- ☐ zaburzenia tikowe
- ☐ uzależnienie od alkoholu/innych SPA (substancji psychoaktywnych)

23. Czy PRZED pandemią byłeś hospitalizowany z przyczyn psychiatrycznych? \*

*Zaznacz tylko jedną odpowiedź.*

- ☐ tak
- ☐ nie

24. Czy W OKRESIE pandemii miałeś/masz kłopoty ze zdrowiem psychicznym (możliwych kilka odpowiedzi) \*

*Zaznacz wszystkie właściwe odpowiedzi.*

- ☐ nie
- ☐ depresja
- ☐ zaburzenia lękowe
- ☐ zachowania impulsywne (np.samookaleczenia)
- ☐ myśli i tendencje samobójcze
- ☐ psychoza (np.schizofrenia)
- ☐ zaburzenia tikowe
- ☐ uzależnienie od alkoholu/innych SPA(substancji psychoaktywnych)

25. Czy W OKRESIE pandemii miałeś/masz kłopoty ze zdrowiem psychicznym, co wiązało się z korzystaniem z porad specjalistów (psycholog, psychoterapeuta, psychiatra)?(możliwych kilka odpowiedzi) \*

*Zaznacz wszystkie właściwe odpowiedzi.*

- ☐ nie
- ☐ depresja
- ☐ zaburzenia lękowe
- ☐ zachowania impulsywne (np.samookaleczenia)
- ☐ myśli i tendencje samobójcze
- ☐ psychoza (np.schizofrenia)
- ☐ zaburzenia tikowe
- ☐ uzależnienie od alkoholu/innych SPA(substancji psychoaktywnych)

26. Czy W OKRESIE pandemii byłeś hospitalizowany z przyczyn psychiatrycznych? \*

*Zaznacz tylko jedną odpowiedź.*

- ☐ tak
- ☐ nie



27. Czy OBECNIE jesteś w trakcie leczenia z uwagi na swój stan psychiczny? \*  
(możliwych kilka odpowiedzi)

*Zaznacz wszystkie właściwe odpowiedzi.*

- ☐ nie  
☐ psychoterapia  
☐ leki przeciwdepresyjne (np. sertralina, fluoksetyna)  
☐ leki uspokajające (np. ziołowe preparaty bez recepty, hydroksyzyna)  
☐ leki przeciwpсихотyczne (np. aripiprazol, haloperydol)

#### Występowanie obaw związanych z zakażeniem COVID-19

28. Czy obawiałeś się, że zarazisz się koronawirusem, a jeśli tak to jak bardzo? \*

*Zaznacz tylko jedną odpowiedź.*

1   2   3   4   5

wca ☐ ☐ ☐ ☐ ☐ w bardzo dużym stopniu

29. Czy obawiałeś się, że któryś z członków Twojej rodziny ulegnie zakażeniu COVID-19? \*

*Zaznacz tylko jedną odpowiedź.*

1   2   3   4   5

wca ☐ ☐ ☐ ☐ ☐ w bardzo dużym stopniu

#### Potrzeba utrzymywania kontaktów społecznych w okresie pandemii

30. Czy odczuwałeś/-aś potrzebę komunikowania się/ kontaktu z innymi członkami rodziny w okresie pandemii? Jak oceniasz ją w stosunku do okresu przed pandemią? (3-bez zmian) \*

*Zaznacz tylko jedną odpowiedź.*

|       |                       |                       |                       |                       |                       |         |
|-------|-----------------------|-----------------------|-----------------------|-----------------------|-----------------------|---------|
|       | 1                     | 2                     | 3                     | 4                     | 5                     |         |
| <hr/> |                       |                       |                       |                       |                       |         |
| mniej | <input type="radio"/> | większa |

31. Czy odczuwałeś/-aś potrzebę komunikowania się/ kontaktu z innymi bliskimi Ci osobami (przyjaciele, koledzy) w okresie pandemii? Jak oceniasz ją w stosunku do okresu przed pandemią? (3-bez zmian) \*

*Zaznacz tylko jedną odpowiedź.*

|       |                       |                       |                       |                       |                       |         |
|-------|-----------------------|-----------------------|-----------------------|-----------------------|-----------------------|---------|
|       | 1                     | 2                     | 3                     | 4                     | 5                     |         |
| <hr/> |                       |                       |                       |                       |                       |         |
| mniej | <input type="radio"/> | większa |

32. Czy potrzebowałeś/-aś emocjonalnego wsparcia w okresie pandemii od członków rodziny? \*

*Zaznacz tylko jedną odpowiedź.*

|                |                       |                       |                       |                       |                       |                   |
|----------------|-----------------------|-----------------------|-----------------------|-----------------------|-----------------------|-------------------|
|                | 1                     | 2                     | 3                     | 4                     | 5                     |                   |
| <hr/>          |                       |                       |                       |                       |                       |                   |
| znacznie mniej | <input type="radio"/> | znacznie bardziej |

33. Czy potrzebowałeś/-aś emocjonalnego wsparcia w okresie pandemii od przyjaciół, kolegów? \*

*Zaznacz tylko jedną odpowiedź.*

|                |                       |                       |                       |                       |                       |                   |
|----------------|-----------------------|-----------------------|-----------------------|-----------------------|-----------------------|-------------------|
|                | 1                     | 2                     | 3                     | 4                     | 5                     |                   |
| <hr/>          |                       |                       |                       |                       |                       |                   |
| znacznie mniej | <input type="radio"/> | znacznie bardziej |

34. Czy zdarzały Ci się konflikty z osobami bliskimi w okresie pandemii? Jak oceniasz ją w stosunku do okresu przed pandemią? (3-bez zmian) \*

*Zaznacz tylko jedną odpowiedź.*

1 2 3 4 5

rzad ☐ ☐ ☐ ☐ ☐ częściej

35. Jak ocenisz jakość Twoich kontaktów z osobami bliskimi w czasie pandemii w stosunku do okresu przed? (3-bez zmian) \*

*Zaznacz tylko jedną odpowiedź.*

1 2 3 4 5

leps ☐ ☐ ☐ ☐ ☐ gorsze

#### Zajęcia szkolne W OKRESIE pandemii

36. Czy zdarzało Ci się opuszczać zajęcia szkolne W OKRESIE pandemii z przyczyn nieusprawiedliwionych (wagary)? \*

*Zaznacz tylko jedną odpowiedź.*

☐ nie

☐ tak

37. Jeśli wagarowałeś/-aś to jak często w stosunku do okresu sprzed pandemii? (3-bez zmian) \*

*Zaznacz tylko jedną odpowiedź.*

1 2 3 4 5

rzad ☐ ☐ ☐ ☐ ☐ częściej

38. Czy miałeś/-aś trudności w skupieniu na zajęciach w stosunku do okresu sprzed pandemii? (3-bez zmian) \*

*Zaznacz tylko jedną odpowiedź.*

1 2 3 4 5

mniej ☐ ☐ ☐ ☐ ☐ więcej

39. Czy Twoje wyniki w nauce (oceny) w stosunku do okresu sprzed pandemii pogorszyły się czy polepszyły? (3-bez zmian) \*

*Zaznacz tylko jedną odpowiedź.*

1 2 3 4 5

pole ☐ ☐ ☐ ☐ ☐ pogorszyły

Lęk i niepokój PRZED pandemią

PRZED pandemią...

40. Czułem/-am się bezpieczny/-a \*

*Zaznacz tylko jedną odpowiedź.*

1 2 3 4 5

bardzo ☐ ☐ ☐ ☐ ☐ wcale

41. Czułem/-am się pełen/-a obaw \*

*Zaznacz tylko jedną odpowiedź.*

1 2 3 4 5

wcale ☐ ☐ ☐ ☐ ☐ bardzo

42. Czułem/-am się obciążony/-a \*

*Zaznacz tylko jedną odpowiedź.*

1 2 3 4 5

wca ☐ ☐ ☐ ☐ ☐ bardzo

43. Czułem/-am się zdenerwowany/-a \*

*Zaznacz tylko jedną odpowiedź.*

1 2 3 4 5

wca ☐ ☐ ☐ ☐ ☐ bardzo

44. Czułem/-am się rozdrażniony/-a \*

*Zaznacz tylko jedną odpowiedź.*

1 2 3 4 5

abs ☐ ☐ ☐ ☐ ☐ absolutnie tak

45. Często się martwiłem/-am \*

*Zaznacz tylko jedną odpowiedź.*

1 2 3 4 5

abs ☐ ☐ ☐ ☐ ☐ absolutnie tak

46. Czułem się zdezorientowany/-a (nie wiedziałeś/-aś co masz robić) \*

*Zaznacz tylko jedną odpowiedź.*

1 2 3 4 5

absolutnie tak ☐ ☐ ☐ ☐ ☐ absolutnie tak

Lęk i niepokój W OKRESIE pandemii

W OKRESIE pandemii...

47. Czułem/-am się bezpieczny/-a \*

*Zaznacz tylko jedną odpowiedź.*

1 2 3 4 5

bardzo ☐ ☐ ☐ ☐ ☐ wcale

48. Czułem/-am się pełen/-a obaw \*

*Zaznacz tylko jedną odpowiedź.*

1 2 3 4 5

wcale ☐ ☐ ☐ ☐ ☐ bardzo

49. Czułem/-am się obciążony/-a \*

*Zaznacz tylko jedną odpowiedź.*

1 2 3 4 5

wcale ☐ ☐ ☐ ☐ ☐ bardzo

50. Czułem/-am się zdenerwowany/-a \*

*Zaznacz tylko jedną odpowiedź.*

1   2   3   4   5

wca ☐ ☐ ☐ ☐ ☐ bardzo

51. Czułem/-am się rozdrażniony/-a \*

*Zaznacz tylko jedną odpowiedź.*

1   2   3   4   5

absol ☐ ☐ ☐ ☐ ☐ absolutnie tak

52. Często się martwiłem/-am \*

*Zaznacz tylko jedną odpowiedź.*

1   2   3   4   5

absol ☐ ☐ ☐ ☐ ☐ absolutnie tak

53. Czułem się zdezorientowany/-a (nie wiedziałeś/-aś co masz robić) \*

*Zaznacz tylko jedną odpowiedź.*

1   2   3   4   5

absol ☐ ☐ ☐ ☐ ☐ absolutnie tak

54. Jak bardzo zmienił się Twój stan emocjonalny związany z powyższymi odczuciami w stosunku do okresu sprzed pandemii (3-bez zmian)? \*

*Zaznacz tylko jedną odpowiedź.*

1   2   3   4   5

znac ☐ ☐ ☐ ☐ ☐ znacznie się pogorszył

### Objawy depresyjne PRZED pandemią

PRZED pandemią...

55. Czułem/-am się bezwartościowy \*

*Zaznacz tylko jedną odpowiedź.*

1   2   3   4   5

wca ☐ ☐ ☐ ☐ ☐ bardzo

56. Czułem/-am, że moje problemy są nierozwiązywalne \*

*Zaznacz tylko jedną odpowiedź.*

1   2   3   4   5

abs ☐ ☐ ☐ ☐ ☐ absolutnie tak

57. Czułem/-am, że świat nie ma sensu \*

*Zaznacz tylko jedną odpowiedź.*

1   2   3   4   5

abs ☐ ☐ ☐ ☐ ☐ absolutnie tak



58. Miałem/-am kłopoty z apetytem \*

*Zaznacz tylko jedną odpowiedź.*

1 2 3 4 5

wca ☐ ☐ ☐ ☐ ☐ bardzo

59. Brakowało mi energii do wykonywania codziennych czynności \*

*Zaznacz tylko jedną odpowiedź.*

1 2 3 4 5

wca ☐ ☐ ☐ ☐ ☐ bardzo

60. To co wcześniej sprawiało mi radość - przestało mnie cieszyć \*

*Zaznacz tylko jedną odpowiedź.*

1 2 3 4 5

abs ☐ ☐ ☐ ☐ ☐ absolutnie tak

61. Miałem/-am problemy ze snem (trudności w zaśnięciu, częste wybudzenia w nocy, koszmary senne) \*

*Zaznacz tylko jedną odpowiedź.*

1 2 3 4 5

abs ☐ ☐ ☐ ☐ ☐ absolutnie tak

62. Czułem/-am się samotny/-a \*

*Zaznacz tylko jedną odpowiedź.*

1   2   3   4   5

absolutnie nie ☐ ☐ ☐ ☐ ☐ absolutnie tak

63. Często płakałem/-am \*

*Zaznacz tylko jedną odpowiedź.*

1   2   3   4   5

absolutnie nie ☐ ☐ ☐ ☐ ☐ absolutnie tak

Objawy depresyjne W OKRESIE pandemii

W OKRESIE pandemii...

64. Czułem/-am się bezwartościowy \*

*Zaznacz tylko jedną odpowiedź.*

1   2   3   4   5

wcale ☐ ☐ ☐ ☐ ☐ bardzo

65. Czułem/-am, że moje problemy są nierozwiązywalne \*

*Zaznacz tylko jedną odpowiedź.*

1   2   3   4   5

absolutnie nie ☐ ☐ ☐ ☐ ☐ absolutnie tak

66. Czułem, że świat nie ma sensu \*

*Zaznacz tylko jedną odpowiedź.*

1 2 3 4 5

absolutnie nie ☐ ☐ ☐ ☐ ☐ absolutnie tak

67. Miałem/-am kłopoty z apetytem \*

*Zaznacz tylko jedną odpowiedź.*

1 2 3 4 5

wcale ☐ ☐ ☐ ☐ ☐ bardzo

68. Brakowało mi energii do wykonywania codziennych czynności \*

*Zaznacz tylko jedną odpowiedź.*

1 2 3 4 5

wcale ☐ ☐ ☐ ☐ ☐ bardzo

69. To co wcześniej sprawiało mi radość - przestało mnie cieszyć \*

*Zaznacz tylko jedną odpowiedź.*

1 2 3 4 5

absolutnie nie ☐ ☐ ☐ ☐ ☐ absolutnie tak

70. Miałem/-am problemy ze snem (trudności w zaśnięciu, częste wybudzenia w nocy, koszmary senne) \*

*Zaznacz tylko jedną odpowiedź.*

1 2 3 4 5

absolutnie tak ☐ ☐ ☐ ☐ ☐ absolutnie tak

71. Czułem/-am się samotny/-a \*

*Zaznacz tylko jedną odpowiedź.*

1 2 3 4 5

absolutnie tak ☐ ☐ ☐ ☐ ☐ absolutnie tak

72. Często płakałem/-am \*

*Zaznacz tylko jedną odpowiedź.*

1 2 3 4 5

absolutnie tak ☐ ☐ ☐ ☐ ☐ absolutnie tak

73. Jak bardzo zmienił się Twój stan emocjonalny związany z powyższymi odczuciami w stosunku do okresu sprzed pandemii (3-bez zmian) \*

*Zaznacz tylko jedną odpowiedź.*

1 2 3 4 5

znacząco się pogorszył ☐ ☐ ☐ ☐ ☐ znacząco się pogorszył

Zachowania agresywne i autoagresywne

74. Czy PRZED pandemią dokonywałeś samookaleczeń? \*

*Zaznacz tylko jedną odpowiedź.*

☐ nie

☐ tak

75. Jeśli zaznaczyłeś/-aś "tak" - co dawały Ci samookaleczenia PRZED pandemią?

*Zaznacz wszystkie właściwe odpowiedzi.*

☐ poczucie ulgi, redukcję napięcia

☐ radość, euforię

☐ robię to, gdy się nudzę

☐ traktuję to jako sposób na śmierć

76. Czy W OKRESIE pandemii dokonywałeś samookaleczeń? \*

*Zaznacz tylko jedną odpowiedź.*

☐ nie

☐ tak

77. Jeśli zaznaczyłeś/-aś "tak" - co dawały Ci samookaleczenia W OKRESIE pandemii?

*Zaznacz wszystkie właściwe odpowiedzi.*

☐ poczucie ulgi, redukcję napięcia

☐ radość, euforię

☐ robię to, gdy się nudzę

☐ traktuję to jako sposób na śmierć

78. Czy zdarzało Ci się kogoś uderzyć/wdać w bójkę PRZED pandemią? \*

*Zaznacz tylko jedną odpowiedź.*

☐ nie

☐ tak

79. Czy zdarzało Ci się kogoś uderzyć/wdać w bójkę W OKRESIE pandemii? \*

*Zaznacz tylko jedną odpowiedź.*

☐ nie

☐ tak

80. Czy byłeś ofiarą przemocy fizycznej PRZED pandemią? \*

*Zaznacz tylko jedną odpowiedź.*

☐ nie

☐ tak

81. Czy byłeś ofiarą przemocy fizycznej W OKRESIE pandemii? \*

*Zaznacz tylko jedną odpowiedź.*

☐ nie

☐ tak

82. Czy byłeś ofiarą przemocy psychicznej PRZED pandemią? \*

*Zaznacz tylko jedną odpowiedź.*

☐ nie

☐ tak

83. Czy byłeś ofiarą przemocy psychicznej W OKRESIE pandemii? \*

*Zaznacz tylko jedną odpowiedź.*

☐ nie

☐ tak

- Zaznacz tylko jedną odpowiedź.*

1 2 3 4 5

zaczynamy w tym miejscu i tonujemy, wreszcie zaczyna się, wreszcie jest znacznie więcej

- Zaznacz tylko jedną odpowiedź.*

1 2 3 4 5

---

wca ☐ ☐ ☐ ☐ ☐ częściej

*Zaznacz tylko jedną odpowiedź.*

1 2 3 4 5

---

wca ☐ ☐ ☐ ☐ ☐ często

- Zaznacz tylko jedną odpowiedź.*

1 2 3 4 5

---

wca ☐ ☐ ☐ ☐ ☐ często

88. Jeśli "tak" - czy myślałeś/-aś o sposobach na samobójstwo PRZED pandemią?

*Zaznacz tylko jedną odpowiedź.*

|     |                       |                       |                       |                       |                       |        |
|-----|-----------------------|-----------------------|-----------------------|-----------------------|-----------------------|--------|
|     | 1                     | 2                     | 3                     | 4                     | 5                     |        |
| wca | <input type="radio"/> | często |

89. Czy PRZED pandemią podjąłeś/aś próbę samobójczą? \*

*Zaznacz tylko jedną odpowiedź.*

- ☐ nie
- ☐ tak - jeden raz
- ☐ tak - kilkakrotnie

90. Jak często myślałeś/-aś o śmierci W OKRESIE pandemii? \*

*Zaznacz tylko jedną odpowiedź.*

|     |                       |                       |                       |                       |                       |        |
|-----|-----------------------|-----------------------|-----------------------|-----------------------|-----------------------|--------|
|     | 1                     | 2                     | 3                     | 4                     | 5                     |        |
| wca | <input type="radio"/> | często |

91. Czy W OKRESIE pandemii występowały u Ciebie myśli samobójcze? \*

*Zaznacz tylko jedną odpowiedź.*

|     |                       |                       |                       |                       |                       |        |
|-----|-----------------------|-----------------------|-----------------------|-----------------------|-----------------------|--------|
|     | 1                     | 2                     | 3                     | 4                     | 5                     |        |
| wca | <input type="radio"/> | często |



92. Jeśli "tak" - czy myślałeś/-aś o sposobach na samobójstwo W OKRESIE pandemii?

*Zaznacz tylko jedną odpowiedź.*

|     |                       |                       |                       |                       |                              |
|-----|-----------------------|-----------------------|-----------------------|-----------------------|------------------------------|
|     | 1                     | 2                     | 3                     | 4                     | 5                            |
| wca | <input type="radio"/> często |

93. Czy W OKRESIE pandemii podjąłeś/aś próbę samobójczą? \*

*Zaznacz tylko jedną odpowiedź.*

- ☐ nie
- ☐ tak - jeden raz
- ☐ tak - kilkakrotnie

#### Substancje psychoaktywne W OKRESIE pandemii

94. palenie tytoniu przed pandemią \*

*Zaznacz tylko jedną odpowiedź.*

- ☐ nie paliłem
- ☐ paliłem okazjonalnie
- ☐ paliłem regularnie

95. spożywanie alkoholu przed pandemią \*

*Zaznacz tylko jedną odpowiedź.*

- ☐ nie piłem
- ☐ piłem okazjonalnie
- ☐ piłem regularnie

96. inne używki przed pandemią (marihuana, amfetamina, dopalacze, inne) \*

*Zaznacz tylko jedną odpowiedź.*

- ☐ nie zażywałem
- ☐ zażywałem okazjonalnie
- ☐ zażywałem regularnie

97. w porównaniu do okresu wcześniejszego - w okresie pandemii paliłeś/-aś (3-bez zmian) \*

*Zaznacz tylko jedną odpowiedź.*

|      | 1                     | 2                     | 3                     | 4                     | 5                     |          |
|------|-----------------------|-----------------------|-----------------------|-----------------------|-----------------------|----------|
| rzad | <input type="radio"/> | częściej |

98. w porównaniu do okresu wcześniejszego - w okresie pandemii spożywałeś/-aś alkohol (3-bez zmian) \*

*Zaznacz tylko jedną odpowiedź.*

|      | 1                     | 2                     | 3                     | 4                     | 5                     |          |
|------|-----------------------|-----------------------|-----------------------|-----------------------|-----------------------|----------|
| rzad | <input type="radio"/> | częściej |

99. w porównaniu do okresu wcześniejszego - w okresie pandemii sięgałeś/-aś po inne używki (3-bez zmian) \*

*Zaznacz tylko jedną odpowiedź.*

|      | 1                     | 2                     | 3                     | 4                     | 5                     |          |
|------|-----------------------|-----------------------|-----------------------|-----------------------|-----------------------|----------|
| rzad | <input type="radio"/> | częściej |

Aktywność fizyczna W OKRESIE pandemii

100. Czy uprawiasz regularnie jakiś sport? (2-3 razy w tygodniu) \*

*Zaznacz tylko jedną odpowiedź.*

☐ nie

☐ tak

101. Czy i jak zmieniła się częstotliwość uprawianego przez Ciebie sportu W OKRESIE pandemii w stosunku do okresu przed nią? (zaznacz odpowiedź jeśli na poprzednie pytanie odpowiedziałeś twierdząco)

*Zaznacz tylko jedną odpowiedź.*

☐ częściej

☐ tak samo często

☐ rzadziej

102. Czy sport pomaga Ci w redukowaniu napięcia, odpręża, zmniejsza poziom lęku?

*Zaznacz tylko jedną odpowiedź.*

☐ bardzo

☐ trochę

☐ nie wpływa

Dziękujemy za wypełnienie ankiety

---

Ta treść nie została utworzona ani zatwierdzona przez Google.

Formularze Google
